# Supplementary material for: Using an Interaction Parameter in Model-Based Phase I Trials for Combination Treatments? A Simulation Study
Source: PubMed Central journal article supplement (PMC7796482; doi:10.3390/ijerph18010345), 2021-01-05
Supplement: ijerph-18-00345-s001.pdf [file ijerph-18-00345-s001.pdf]

Sheet1

| Scenario | Sc 1 | Sc 2 | Sc 2.1 | Sc 2.2 | Sc 3 | Sc 4 | Sc 5            |
|----------|------|------|--------|--------|------|------|-----------------|
| M0       | 44.9 | 52.5 | 43.8   | 43.7   | 52.5 | 54.3 | 56.5            |
| M1       | 74.7 | 59.6 | 37.8   | 42.0   | 57.7 | 54.8 | 54.2            |
| M3       | 73.4 | 59.6 | 45.9   | 36.1   | 56.8 | 53.7 | 52.4            |
|          |      |      |        |        |      |      | <b>Percenta</b> |
| M0       | 29.7 | 32.8 | 24.2   | 23.0   | 30.4 | 31.9 | 34.4            |
| M1       | 56.1 | 39.8 | 21.1   | 31.7   | 37.6 | 34.1 | 31.0            |
| M3       | 56.1 | 37.7 | 24.4   | 26.1   | 36.2 | 32.2 | 30.2            |
| M0       | 24.4 | 21.9 | 22.8   | 23     | 20.3 | 18.8 | 17.3            |
| M1       | 21.4 | 19.7 | 20.6   | 20.1   | 18.4 | 17.5 | 16.6            |
| M3       | 21.5 | 19.9 | 20.7   | 20.4   | 18.7 | 17.8 | 16.8            |
| M0       | 49.5 | 54.7 | 40.3   | 38.3   | 50.7 | 53.2 | 57.3            |
| M1       | 93.5 | 66.3 | 35.2   | 52.8   | 62.7 | 56.8 | 51.7            |
| M3       | 93.5 | 62.8 | 40.7   | 43.5   | 60.3 | 53.7 | 50.3            |

| Scenario | Sc 1 | Sc 2 | Sc 2.1 | Sc 2.2 | Sc 3 | Sc 4 | Sc 5            |
|----------|------|------|--------|--------|------|------|-----------------|
| M0       | 75.1 | 49.1 | 37.1   | 27.6   | 48.8 | 50.5 | 53.4            |
| M1       | 72.7 | 55.7 | 34.2   | 38.2   | 52.6 | 51.3 | 49.4            |
| M3       | 70.7 | 54.2 | 41.5   | 31.9   | 51.6 | 49.5 | 47.0            |
|          |      |      |        |        |      |      | <b>Percenta</b> |
| M0       | 48.3 | 33.0 | 21.4   | 22.5   | 30.6 | 31.2 | 30.6            |
| M1       | 56.1 | 37.8 | 19.5   | 29.1   | 34.7 | 30.3 | 27.8            |
| M3       | 56.4 | 36.2 | 22.8   | 24.0   | 33.3 | 29.6 | 27.1            |
| M0       | 18.1 | 16.8 | 17.1   | 17.4   | 15.8 | 14.7 | 13.4            |
| M1       | 17.2 | 15.6 | 16.4   | 16     | 14.5 | 13.6 | 12.7            |
| M3       | 17.2 | 15.8 | 16.4   | 16.2   | 14.7 | 13.7 | 12.8            |
| M0       | 37.7 | 35.0 | 35.6   | 36.3   | 32.9 | 30.6 | 27.9            |
| M1       | 35.8 | 32.5 | 34.2   | 33.3   | 30.2 | 28.3 | 26.5            |
| M3       | 35.8 | 32.9 | 34.2   | 33.8   | 30.6 | 28.5 | 26.7            |

| Scenario | Sc 1 | Sc 2 | Sc 2.1 | Sc 2.2 | Sc 3 | Sc 4 | Sc 5 |
|----------|------|------|--------|--------|------|------|------|
| M0       | 22.5 | 40.7 | 30.6   | 32.7   | 39.6 | 40.3 | 41.9 |
| M1       | 67.1 | 46.3 | 28.0   | 30.8   | 43.1 | 39.0 | 37.1 |

Sheet1

|           |      |      |      |      |      |      |                 |
|-----------|------|------|------|------|------|------|-----------------|
| <b>M3</b> | 64.9 | 45.6 | 32.2 | 25.8 | 42.1 | 39.4 | 37.9            |
|           |      |      |      |      |      |      | <b>Percent:</b> |
| <b>M0</b> | 28.8 | 27.7 | 16.8 | 18.5 | 24.2 | 24.5 | 26.4            |
| <b>M1</b> | 57.6 | 33.0 | 17.0 | 22.7 | 29.4 | 23.7 | 20.2            |
| <b>M3</b> | 57.7 | 32.5 | 19.6 | 20.1 | 28.7 | 23.4 | 20.0            |
| <b>M0</b> | 12.5 | 10.8 | 11.8 | 11.7 | 9.6  | 8.4  | 7.2             |
| <b>M1</b> | 10.7 | 9.5  | 10.2 | 9.9  | 8.6  | 7.8  | 6.9             |
| <b>M3</b> | 10.7 | 9.5  | 10.1 | 10   | 8.6  | 7.8  | 7               |
| <b>M0</b> | 41.7 | 36.0 | 39.3 | 39.0 | 32.0 | 28.0 | 24.0            |
| <b>M1</b> | 35.7 | 31.7 | 34.0 | 33.0 | 28.7 | 26.0 | 23.0            |
| <b>M3</b> | 35.7 | 31.7 | 33.7 | 33.3 | 28.7 | 26.0 | 23.3            |

N=60

| Sc 6                                                                   | Sc 6.1 | Sc 6.2 | Sc 7 | Sc 8 | Sc 9 | Sc 10 | Sc 11 | Sc 12 |
|------------------------------------------------------------------------|--------|--------|------|------|------|-------|-------|-------|
| <b>Percentage of correct selection (PCS)</b>                           |        |        |      |      |      |       |       |       |
| 61.7                                                                   | 43.8   | 44.5   | 69.0 | 55.5 | 64.4 | 59.0  | 55.6  | 53.1  |
| 55.1                                                                   | 40.7   | 36.2   | 75.8 | 56.8 | 67.9 | 52.3  | 58.5  | 39.7  |
| 55.4                                                                   | 31.4   | 37.8   | 76.3 | 55.7 | 69.8 | 51.1  | 59.6  | 57.4  |
| <b>Percentage of patients allocated to a true MTD during the trial</b> |        |        |      |      |      |       |       |       |
| 44.3                                                                   | 33.5   | 24.8   | 37.0 | 29.6 | 25.5 | 35.5  | 28.5  | 28.2  |
| 35.9                                                                   | 24.8   | 21.4   | 47.7 | 34.7 | 37.4 | 32.7  | 34.4  | 26.3  |
| 34.7                                                                   | 20.4   | 20.4   | 48.1 | 28.1 | 35.6 | 31.4  | 32.5  | 31.1  |
| <b>Mean number of DLTs throughout the trial</b>                        |        |        |      |      |      |       |       |       |
| 15                                                                     | 14.3   | 16.2   | 12.1 | 18.4 | 20.6 | 19.8  | 20.7  | 20.5  |
| 15.2                                                                   | 14.9   | 16.1   | 12.7 | 17.5 | 18.4 | 18.3  | 19    | 18.9  |
| 15.2                                                                   | 14.8   | 16.2   | 12.7 | 17.5 | 18.8 | 18.5  | 19.4  | 18.9  |
| <b>Percentage of DLTs throughout the trial</b>                         |        |        |      |      |      |       |       |       |
| 73.8                                                                   | 55.8   | 41.3   | 61.7 | 49.3 | 42.5 | 59.2  | 47.5  | 47.0  |
| 59.8                                                                   | 41.3   | 35.7   | 79.5 | 57.8 | 62.3 | 54.5  | 57.3  | 43.8  |
| 57.8                                                                   | 34.0   | 34.0   | 80.2 | 46.8 | 59.3 | 52.3  | 54.2  | 51.8  |

N=48

| Sc 6                                                                   | Sc 6.1 | Sc 6.2 | Sc 7 | Sc 8 | Sc 9 | Sc 10 | Sc 11 | Sc 12 |
|------------------------------------------------------------------------|--------|--------|------|------|------|-------|-------|-------|
| <b>Percentage of correct selection (PCS)</b>                           |        |        |      |      |      |       |       |       |
| 54.5                                                                   | 19.6   | 51.5   | 70.9 | 45.4 | 67.0 | 45.7  | 54.2  | 54.8  |
| 49.5                                                                   | 36.2   | 32.1   | 73.3 | 48.5 | 59.5 | 46.9  | 53.3  | 35.0  |
| 48.3                                                                   | 26.7   | 32.8   | 73.6 | 49.5 | 61.4 | 47.3  | 53.8  | 51.0  |
| <b>Percentage of patients allocated to a true MTD during the trial</b> |        |        |      |      |      |       |       |       |
| 36.2                                                                   | 18.6   | 23.0   | 38.5 | 28.8 | 24.0 | 30.7  | 25.9  | 31.6  |
| 31.1                                                                   | 21.6   | 17.3   | 41.9 | 21.3 | 31.5 | 29.9  | 31.7  | 23.7  |
| 29.8                                                                   | 17.4   | 16.9   | 42.3 | 23.4 | 29.8 | 28.9  | 30.3  | 27.7  |
| <b>Mean number of DLTs throughout the trial</b>                        |        |        |      |      |      |       |       |       |
| 11.6                                                                   | 10.9   | 12.4   | 9.4  | 14   | 15.6 | 15.3  | 16.3  | 15.3  |
| 11.5                                                                   | 11.2   | 12.3   | 9.5  | 13.5 | 14.5 | 14.2  | 15    | 14.8  |
| 11.5                                                                   | 11     | 12.3   | 9.4  | 13.5 | 14.7 | 14.4  | 15.2  | 14.7  |
| <b>Percentage of DLTs throughout the trial</b>                         |        |        |      |      |      |       |       |       |
| 24.2                                                                   | 22.7   | 25.8   | 19.6 | 29.2 | 32.5 | 31.9  | 34.0  | 31.9  |
| 24.0                                                                   | 23.3   | 25.6   | 19.8 | 28.1 | 30.2 | 29.6  | 31.3  | 30.8  |
| 24.0                                                                   | 22.9   | 25.6   | 19.6 | 28.1 | 30.6 | 30.0  | 31.7  | 30.6  |

N=30

| Sc 6                                         | Sc 6.1 | Sc 6.2 | Sc 7 | Sc 8 | Sc 9 | Sc 10 | Sc 11 | Sc 12 |
|----------------------------------------------|--------|--------|------|------|------|-------|-------|-------|
| <b>Percentage of correct selection (PCS)</b> |        |        |      |      |      |       |       |       |
| 49.7                                         | 28.3   | 38.4   | 53.1 | 32.9 | 35.3 | 43.7  | 40.3  | 36.9  |
| 37.4                                         | 25.6   | 23.4   | 66.5 | 32.7 | 42.0 | 39.3  | 42.8  | 27.3  |

Sheet1

|                                                                        |      |      |      |      |      |      |      |      |
|------------------------------------------------------------------------|------|------|------|------|------|------|------|------|
| 37.2                                                                   | 20.3 | 23.7 | 66.8 | 36.5 | 47.2 | 38.7 | 42.4 | 38.8 |
| <b>Percentage of patients allocated to a true MTD during the trial</b> |      |      |      |      |      |      |      |      |
| 27.0                                                                   | 18.2 | 14.7 | 16.8 | 20.5 | 11.7 | 26.8 | 20.9 | 20.7 |
| 20.5                                                                   | 14.7 | 9.9  | 26.8 | 13.1 | 19.7 | 23.7 | 26.9 | 18.7 |
| 19.3                                                                   | 12.0 | 10.0 | 26.7 | 15.3 | 20.6 | 23.5 | 25.8 | 21.0 |
| <b>Mean number of DLTs throughout the trial</b>                        |      |      |      |      |      |      |      |      |
| 5.8                                                                    | 5.2  | 6.3  | 4.4  | 7.7  | 9.4  | 9.1  | 10   | 9.3  |
| 5.9                                                                    | 5.6  | 6.4  | 4.7  | 7.3  | 8.5  | 8.2  | 8.9  | 8.5  |
| 5.9                                                                    | 5.5  | 6.4  | 4.7  | 7.3  | 8.5  | 8.3  | 9    | 8.4  |
| <b>Percentage of DLTs throughout the trial</b>                         |      |      |      |      |      |      |      |      |
| 19.3                                                                   | 17.3 | 21.0 | 14.7 | 25.7 | 31.3 | 30.3 | 33.3 | 31.0 |
| 19.7                                                                   | 18.7 | 21.3 | 15.7 | 24.3 | 28.3 | 27.3 | 29.7 | 28.3 |
| 19.7                                                                   | 18.3 | 21.3 | 15.7 | 24.3 | 28.3 | 27.7 | 30.0 | 28.0 |

| Sc 13 | Sc 14 | Geometric mean | Variance     |
|-------|-------|----------------|--------------|
| 36.9  | 33.1  | 50.5           | 89.8         |
| 45.5  | 31.4  | 50.8           | 165.2        |
| 43.9  | 32.1  | 51.1           | 172.4        |
| 19.5  | 26.0  | 29.4           | 34.6         |
| 18.8  | 22.2  | 31.4           | 91.8         |
| 20.6  | 20.7  | 30.2           | 90.9         |
| 18.6  | 16.2  | 18.7           | 10.8         |
| 17.7  | 16.4  | 17.6           | 4.8          |
| 17.7  | 16.4  | 17.7           | 5.1          |
| 32.5  | 43.3  | <b>49.0</b>    | <b>96.2</b>  |
| 31.3  | 37.0  | <b>52.3</b>    | <b>255.1</b> |
| 34.3  | 34.5  | <b>50.4</b>    | <b>252.4</b> |

| Sc 13 | Sc 14 | Geometric mean | Variance    |
|-------|-------|----------------|-------------|
| 34.7  | 10.1  | 43.3           | 279.5       |
| 41.5  | 29.2  | 46.2           | 161.7       |
| 40.9  | 28.7  | 46.1           | 168.2       |
| 18.8  | 17.0  | 27.4           | 62.9        |
| 15.4  | 19.9  | 27.5           | 98.2        |
| 17.5  | 18.1  | 27.0           | 95.7        |
| 14.3  | 12.5  | 14.3           | 5.8         |
| 13.7  | 12.5  | 13.7           | 3.9         |
| 13.7  | 12.4  | 13.7           | 4.2         |
| 29.8  | 26.0  | <b>29.8</b>    | <b>25.1</b> |
| 28.5  | 26.0  | <b>28.5</b>    | <b>16.8</b> |
| 28.5  | 25.8  | <b>28.6</b>    | <b>18.0</b> |

| Sc 13 | Sc 14 | Geometric mean | Variance |
|-------|-------|----------------|----------|
| 19.9  | 23.2  | 35.0           | 80.4     |
| 25.9  | 27.1  | 36.1           | 160.2    |

|      |      |             |             |
|------|------|-------------|-------------|
| 28.9 | 25.7 | 36.8        | 156.8       |
| 12.1 | 15.2 | 19.9        | 30.2        |
| 9.6  | 14.8 | 20.4        | 119.2       |
| 10.6 | 12.7 | 20.3        | 117.6       |
| 8    | 6.2  | 8.2         | 5.6         |
| 7.5  | 6.4  | 7.7         | 2.8         |
| 7.5  | 6.4  | 7.7         | 2.8         |
| 26.7 | 20.7 | <b>27.3</b> | <b>62.3</b> |
| 25.0 | 21.3 | <b>25.6</b> | <b>31.1</b> |
| 25.0 | 21.3 | <b>25.6</b> | <b>31.3</b> |
